# Supplementary material
Source: PubMed Central journal article supplement (PMC1735499)
Supplement: jmedgene_40_6_447__1.pdf [file jmedgene_40_6_447__1.pdf]

**Table W1** PCR/sequencing primers

| <b>Primer</b> | <b>Sequence</b>               | <b>Target region</b>     |
|---------------|-------------------------------|--------------------------|
| 5'S-1F        | 5'-CAGAGCTGGCTGCTGCTTCCTGC-3' | CDSN putative promoter   |
| 5'S-1R        | 5'-GCAGTGCCATCATCCCGTGC-3'    |                          |
| SEX1F         | 5'-CCCACAGTGACTCCTGC-3'       | CDSN Exon 1              |
| SEX1R         | 5'-AGATTCCAGAGCCCCTG-3'       |                          |
| SEX2P1        | 5'-GTGAGGGAGGAAGCCAAG-3'      | CDSN Exon 2 nt 99-1026   |
| SEX2P4        | 5'-ACTGGAGCTGCTGCTGAAGG-3'    |                          |
| SEX2P5        | 5'-GGGTAAAATCTATCCTGTGGG-3'   | CDSN Exon 2 nt 903-1918  |
| CDR1          | 5'-GGCGTCAGAGGTGCTCTGAG-3'    |                          |
| SEX2P9        | 5'-GCATGCCTTGGGCACAAACAAGC-3' | CDSN Exon 2 nt 1623-2510 |
| SEX2P10       | 5'-TTCCTCCTCTGTGGGAGGAGC-3'   |                          |
| GTF2H4F       | 5'-TCTGCCCTCAATTACCTCTC-3'    | GTF2H4 Exons 1-2         |
| GTF2H4R       | 5'-GTTTCACCATGTTGGCCAGG-3'    |                          |
