# Supplementary material
Source: PubMed Central journal article supplement (PMC1735499)
Supplement: jmedgene_40_6_447__2.pdf [file jmedgene_40_6_447__2.pdf]

**Table W2** CDSN SNPs identified by resequencing

|             | <b>SNP Position</b> | <b>Nucleotide Change</b> |
|-------------|---------------------|--------------------------|
| <b>-712</b> | Promoter            | c / t                    |
| <b>-646</b> | Promoter            | a / g                    |
| <b>-461</b> | Promoter            | c / t                    |
| <b>-31</b>  | Promoter            | a / g                    |
| <b>-22</b>  | Promoter            | c / t                    |
| <b>9</b>    | 5'UTR (exon1)       | c / t                    |
| 75i         | Intron 1            | a / g                    |
| 137         | Coding(exon 2)      | c / t                    |
| 180         | Coding(exon 2)      | c / t                    |
| 206         | Coding(exon 2)      | c / t                    |
| <b>442</b>  | Coding(exon 2)      | a / g                    |
| 614         | Coding(exon 2)      | a / g                    |
| <b>619</b>  | Coding(exon 2)      | c / t                    |
| 722         | Coding(exon 2)      | c / t                    |
| 767         | Coding(exon 2)      | g / a                    |
| 971         | Coding(exon 2)      | c / t                    |
| 1118        | Coding(exon 2)      | a / g                    |
| <b>1215</b> | Coding(exon 2)      | a / g                    |
| <b>1236</b> | Coding(exon 2)      | g / t                    |
| <b>1243</b> | Coding(exon 2)      | c / t                    |
| 1331        | Coding(exon 2)      | c / g                    |
| <b>1593</b> | Coding(exon 2)      | g / a                    |
| <b>1606</b> | 3'UTR               | del / aag                |
| <b>1675</b> | 3'UTR               | g / t                    |
| <b>1739</b> | 3'UTR               | c / t                    |
| <b>1747</b> | 3'UTR               | c / t                    |

The variants selected for genotyping are typed in bold
